# Supplementary material
Source: PubMed Central journal article supplement (PMC3131139)
Supplement: supp_pp.111.177196_67-PP-Fig_S3_ok.pdf [file supp_pp.111.177196_67-PP-Fig_S3_ok.pdf]

Lj-h8 -----MGN**C**VAKYHAKDDSD-HVEFAGDNVTIITTK**E**AWDQKLE**E**AKR**D**GK**I**VI  
Mt-h8 -----MGN**C**LAKSRDRDNDSDQHVEFAAGNVALITTK**E**AWDQKLE**E**AKK**D**GK**I**VI  
Mt-h12 MDFFSVHPHYCLFPLSQSQTKDDSDVQHVEFASGNVQLITTK**E**SWNQ**T**LEQARGDRK**I**VI  
Lj-h4 -----MGGVLSLFGGGGAGAASDPPESSRVHTFHSPARWQLHFNEHKDSSALLV  
Mt-h4 -----MGSFLSSVGGGGSQSSSESSNSSVKT**F**HSSARWQLHFNE**L**KD**S**PRLV**V**  
Lj-h6 -----MGANLSN**M**ESAHA**S**TN-----SPHIL**T**FH**F**TAK**W**KAHL**D**ASK**E**T**N**K**L**M**V**  
Mt-h6 -----MGGNLSN**M**EHG**H**T**S**AK**S**L---SSHIL**T**FH**S**TAK**W**KAY**F**DASK**E**T**N**K**L**M**V**  
Mt-h7 -----MGANF**S**N**L**ES**V**VE**K**SS**Q**----PSLIL**T**FH**S**TAK**W**KA**H**FE**A**SK**V**T**N**K**L**M**V**  
Mt-h5 -----MSSN**L**Y**N**F**V**Y**I**DR**S**TES-----SHV**L**T**F**H**S**TAK**W**NA**H**FE**A**FK**E**T**N**K**L**M**V**  
Lj-h3 -----MAGSS**E**EG**Q**V**S**VH**S**VD**A**W**T**DHL**N**K**G**NE**S**SK**L**I**V**  
Mt-h3 -----MAGS**E**EG**Q**V**I**GV**H**N**V**DA**W**ND**I**L**H**R**G**NE**S**SK**L**I**V**  
Lj-h1 -----MAA**E**EG**T**V**I**GV**H**T**V**E**A**W**K**EH**L**E**K**GN**S**SK**L**I**V**  
Mt-h1 -----MAA**E**EG**H**V**I**GV**H**T**V**E**A**W**K**EH**L**E**K**GN**S**SK**L**I**V**  
Mt-h2 -----MAA**E**EG**Q**V**I**GV**H**T**V**E**Q**W**K**E**E**I**Q**K**G**ND**S**SK**L**I**V**  
Lj-h9 -----M**E**ST**E**HK**S**R**V**V**I**DS**L**Q**S**W**E**F**Y**V**N**Q**A**SN**Q**NC**P**I**V**  
Mt-h9 -----M**E**NT**E**EN**K**SK**V**V**I**DS**L**Q**S**W**E**F**H**V**N**Q**A**SN**Q**NS**P**I**V**  
Mt-h10 -----M**E**G**Q**E**Y**L**K**K**S**K**V**I**K**IDS**K**S**W**E**H**Y**I**SY**A**T**N**Q**S**Y**P**V**V**  
Mt-h11 -----M**G**G**Q**Q**H**K**K**SK**V**V**K**IDS**R**K**S**W**E**H**H**I**F**E**A**T**N**K**G**Y**P**V**M**

\*

Lj-h8 ANFS**A****T****W****C****G****P****C**K**I**I**A**P**Y****Y**C**E**L**S**E**K**Y**T**S**M**M**F**L**L**V**D**V**D**E**L**T**D**F**S**T**S**W**D**I**K**A**T****P****T****F****F**L**K**D**G**Q  
Mt-h8 ANFS**A****V****W****C****G****P****C**K**V**I**A**P**Y****Y**C**E**M**S**E**K**Y**T**S**M**M**F**L**L**V**D**V**D**E**L**T**D**F**S**T**S**W**D**I**K**A**T****P****T****F****F**L**K**D**G**Q  
Mt-h12 ANFS**A****R****W****C****S****P****C**K**I**I**A**P**Y****Y**C**E**L**S**E**K**Y**S**I**M**F**L**V**I**D**V****D**E**L**T**D**F**S**T**S**W**D**I**K**A**T****P****T****F****F**L**R**D**G**Q  
Lj-h4 IDFS**A****S****W****C****G****P****C**R**F**I**E**P**A**I**H**A**M**A**E**K**F**S**D**V**V**F**N**K**I**D**V****D**E**L**P**D**V**A**K**E**F**E**V**Q**A**M****P****T****F**V**L**V**K**R**G**K  
Mt-h4 IDFS**A****T****W****C****G****P****C**K**M**M**E**P**I**L**Q**A**M**A**N**E**F**T**D**V**E**F**I**K**I**D**V****D**E**L**S**D**V**A**Q**E**F**K**V**Q**A**M****P****T****F**L**L**L**K**N**G**K  
Lj-h6 IDFT**A****K****W****C****G****P****C**K**S**M**E**P**I**I**Q**E**F**V**A**K**Y**T**K**V**E**F**I**K**I**D**V****D**E**L**M**E**V**T**Q**E**F**Q**V**Q**A**M****P****T****F**I**L**M**K**K**D**K  
Mt-h6 IEFT**A****A****W****C****G****P****C**K**Y**M**D**P**I**I**Q**D**F**A**A**K**Y**I**K**V**D**F**I**K**I**D**V****D**E**L**M**S**I**S**Q**E**F**Q**V**Q**A**M****P****T****F**I**L**M**K**K**G**K  
Mt-h7 IDFT**A****T****W****C****G****P****C**K**Y**M**D**P**I**I**K**E**L**A**A**K**Y**T**D**V**E**F**I**K**I**D**V****D**E**L**M**E**V**A**S**A**F**Q**V**Q**A**M****P****T****F**I**L**L**K**K**G**K  
Mt-h5 IDFT**A****K****W****C****G****P****C**K**V**M**D**P**V**M**K**D**F**A**A**K**Y**T**D**V**E**F**I**K**L**D**V****D**E**L**M**G**V**S**Q**T**F**Q**V**H**S**L****P****T****F**L**L**I**K**K**G**K  
Lj-h3 VDF**T****A****S****W****C****G****P****C**R**F**I**A**P**Y**L**G**E**L**A**K**K**Y**T**N**V**I**F**L**K**V**D**V****D**E**L**K**S**V**A**Q**D**W**A**V**E**A**M****P****T****F**M**F**V**K**E**G**S  
Mt-h3 VDF**T****A****S****W****C****G****P****C**R**F**I**A**P**F**L**A**E**L**A**K**K**Y**T**N**A**I**F**L**K**V**D**V****D**E**L**K**S**V**A**Q**D**W**A**I**E**A**M****P****T****F**V**F**V**K**E**G**T  
Lj-h1 VDF**T****A****S****W****C****G****P****C**R**F**I**A**P**I**L**A**E**I**A**K**K**L**P**H**V**V**F**L**K**V**D**V****D**E**L**K**T**V**A**E**E**W**N**V**E**A**M****P****T****F**L**F**L**K**E**G**K  
Mt-h1 VDF**T****A****S****W****C****G****P****C**R**F**I**A**P**I**L**A**E**I**A**K**K**L**P**N**V**T**F**L**K**V**D**V****D**E**L**K**T**V**A**E**E**W**A**V**D**A**M****P****T****F**L**F**L**K**E**G**K  
Mt-h2 VDF**T****A****S****W****C****G****P****C**R**F**I**A**P**I**L**A**E**I**A**K**K**I**P**E**V**I**F**L**K**V**D**I****D**E**V**K**S**V**A**K**E**S**V**E**A**M**P****T****F**L**F**L**K**E**G**K  
Lj-h9 VHF**S****A****S****W****C****M****P**S**V**A**M**N**P**F**F**E**D**M**A**S**S**Y**P**D**F**L**F**L**N**V**D**V**D**E**V**K**D**V**A**T**R**L**E**I**K**A**M****P****T****F**V**F**L**K**D**G**A  
Mt-h9 VHF**T****A****S****W****C****M****P**S**V**A**M**I**P**F**F**E**E**F**A**S**D**Y**P**D**F**L**F**L**S**V**D**V**D**E**V**K**E**V**A**T**K**N**D**I**K**A**M****P****T****F**L**L**L**K**D**G**A  
Mt-h10 VHF**S****A****F****W****C****V****P**S**I**Q**M**N**P**F**F**Q**E**L**A**S**N**Y**Q**D**V**L**F**L**T**L**D**V**D**E**V**K**E**I**A**S**K**M**E**I**K**A**I****P****T****F**L**F**L**N**G**G**T  
Mt-h11 VHF**S****A****Y****W****C****V****P**S**I**A**M**D**P**F**F**E**E**L**A**S**T**Y**Q**D**V**L**F**L**K**V**D**V**D**E**V**K**E**V**A**S**K**L**E**I**N**A**M****P****T****F**L**L**M**S**G**G**T

\* \* \* \* \* \* \* \* \* \*

Lj-h8 Q**L**D**K**L**V**G**A**N**R**P**E**L**E**K**K**V**V**A**I**A**D**S**V**P**E**S**K**Q-  
Mt-h8 Q**L**D**K**L**V**G**A**N**K**P**E**L**E**K**K**L**V**A**I**A**D**S**V**P**Q**N**K**Q-  
Mt-h12 E**I**D**K**L**V**G**A**N**K**P**E**L**E**K**K**I**A**A**V**N**L**V**P**R**Y**Q---  
Lj-h4 E**V**A**R**V**I**G**A**K**K**D**E**L**E**K**K**V**E**Q**L**R**A**-----  
Mt-h4 E**V**D**K**V**V**G**A**K**K**D**E**L**K**N**K**V**Q**K**H**K**A**-----  
Lj-h6 V**A**G**K**V**V**G**A**K**K**E**E**L**Q**K**L**I**E**K**H**Q**S**-----  
Mt-h6 V**V**D**K**V**V**G**A**K**K**E**E**L**E**K**L**I**E**K**H**Q**N**-----  
Mt-h7 V**V**E**K**V**V**G**A**K**K**E**Q**L**Q**K**L**I**E**K**R**R**V**-----  
Mt-h5 V**V**D**K**V**V**G**A**R**K**E**E**L**Q**R**M**I**E**K**Q**R**N**-----  
Lj-h3 I**V**D**K**V**V**G**A**K**K**E**E**L**Q**Q**K**I**E**K**H**V**A**T**A**S**A**----  
Mt-h3 I**L**G**K**V**V**G**A**K**K**D**E**L**T**Q**T**I**E**K**H**V**A**S**A**N**V**----  
Lj-h1 A**V**D**K**V**V**G**A**K**K**E**E**L**Q**L**T**I**T**K**H**A**E**A**P**G**T**S**T**A-  
Mt-h1 L**V**D**K**V**V**G**A**Q**K**D**Q**L**Q**A**A**I**T**K**H**A**T**T**D**A----  
Mt-h2 E**V**D**K**V**V**G**A**R**K**E**E**L**E**N**A**I**T**K**H**K**D**A**T**V**A**T**A**--  
Lj-h9 P**L**E**K**L**V**G**A**N**P**E**E**I**K**R**I**D**G**F**V**H**S**T**H**A**S**I**A**-  
Mt-h9 P**S**D**K**I**V**G**A**N**P**E**E**I**K**R**I**E**G**F**V**Q**S**T**R**A**S**I**A**-  
Mt-h10 L**V**D**K**I**V**G**A**N**P**D**E**I**R**K**R**V**D**H**F**I**Q**S**T**P**S**----  
Mt-h11 P**V**E**K**A**V**G**A**N**P**D**E**I**R**K**R**M**D**H**F**I**N**Q**T**H**S**S**K**S**L**

\*\*
