# Supplementary material
Source: PubMed Central journal article supplement (PMC3131139)
Supplement: supp_pp.111.177196_67-PP-Table_S1_ok.pdf [file supp_pp.111.177196_67-PP-Table_S1_ok.pdf]

**Table S1.** Primers used for RT-PCR analyses

| Gene                           | Forward                  | Reverse                    |
|--------------------------------|--------------------------|----------------------------|
| <i>Lj1CPrx</i>                 | GCAGGAACATGGATGAAGTGC    | TTTGAGGCCTTCTGCAGTGAC      |
| <i>Lj2CPrxA</i>                | TATTTTAAGCGGCAGGGTCT     | TCCAAAATCCAGGTTACACCA      |
| <i>Lj2CPrxB</i>                | TGCGCATCTGTATAATTGGCG    | CCTGCGGCTCAAATTTTAAGC      |
| <i>LjPrxQ1</i>                 | TACCAAACAGGCTTGCCT       | CCTCAGCTCCTGCTTTCTTGA      |
| <i>LjPrxIIB</i>                | ACCCCCAAACTGTCTCCATT     | TGATGACCTTTTTGCCGGC        |
| <i>LjPrxIIE</i>                | TGAGGTGCTGCTATTGTCCGA    | CCCAATGGCTCTGGTGAAATC      |
| <i>LjPrxIIF</i>                | GTGTGATGAAGCGAGCTGGTT    | CCTGATTCTGAAGAGCAGCAGA     |
| <i>LjTrxh1</i>                 | CATGCTGAAGCTCCTGGAA      | TTTCGCAAACACCATAGCTG       |
| <i>LjTrxh3</i>                 | ACAAAGTGGTGGGAGCAAAG     | CACTGCGTCTCTGGAGCTAA       |
| <i>LjTrxh4</i>                 | GCTTGAGAAGAAGGTTGAGCA    | CAGCATCATCAAATATGTCCAA     |
| <i>LjTrxh6</i>                 | AGACAAAGTTGCTGGCAAGG     | GGCCATGTGCAAGATCATACT      |
| <i>LjTrxh8</i>                 | GCTGGAGAAGAAGGTTGTCTG    | AGGAGAAATCCCACAACAGC       |
| <i>LjTrxh9</i>                 | TTTGTTCACTCCACTCATGC     | AAAGACTTTTGACCCGGATG       |
| <i>LjTrxf</i>                  | CGCTGCCATAGAAACTGTCC     | CAAAGGGTGTGTCAAGCAT        |
| <i>LjTrxm1</i>                 | CCCAAGTCCACTTTGACTGC     | TCGTGAGATAATCCTTGGTTCA     |
| <i>LjTrxm2</i>                 | ATCGGTGCTGTGCCTAAAAC     | GGCTTAATGGCAGGAAGCTA       |
| <i>LjTrxm4</i>                 | GTCAACATTGACCTCGAGCA     | GCAATTTTCCTTCGCAACAT       |
| <i>LjTrxx</i>                  | TTGGATGCTTTATTGGAATCG    | AAACTGTAAAAGCCTGTAAACTGC   |
| <i>LjTrxy</i>                  | GAACGCATAGAAACCAGTCTCA   | TCGAACATTCCAATAGACAAGC     |
| <i>LjTrxz</i>                  | CCGAAGGACTCATCCCAATA     | CAGGATCCAGGGACTTCAAC       |
| <i>LjTrxo</i>                  | AGCTTGTAGGCGCTGATGTT     | CAGCCATTCCCAAAGTCAGT       |
| <i>LjNTRA</i>                  | GCAGCGGTAGACTTGCATTATT   | CATGTACGTGTGGTGTCGATTG     |
| <i>LjNTRB</i>                  | CATGGCAGCCTTGGATGTAGA    | ATTCATTACCCCTACGCTCG       |
| <i>LjNTRC</i>                  | AGGCTACCCCGAGAAGATGAA    | GAGAGGTGATGCACCATCACA      |
| <i>LjNTRA (L)<sup>a</sup></i>  | CTACTGGAAAAAGAGTCAAAGG   | TGTGAACGGCAATCTCTT         |
| <i>LjNTRA (LS)<sup>a</sup></i> | AAGAGATTGCCGTTTCAACA     | CAGTGAGTGCTGCCTCTAA        |
| <i>LjNTRB (L)<sup>a</sup></i>  | TACTGGAAAACAGAAATAGTTGAA | GGATTCTTCATCACCTTCTC       |
| <i>LjNTRB (LS)<sup>a</sup></i> | GAGAAGGTGATGAAGAATCC     | CAGAAGTAGCTTTTCACTATCTTATG |
| <i>LjFTRB</i>                  | AATTGCCCATGTGTTCCAAT     | GGTGATAGCCTGTTCCCTGC       |

<sup>a</sup> Forward and reverse primers (5'→3') used for conventional RT-PCR analyses (*L*, long mRNA; *LS*, long plus short mRNAs). All other primers (5'→3') were designed for qRT-PCR.
