# Supplementary material
Source: PubMed Central journal article supplement (PMC3131139)

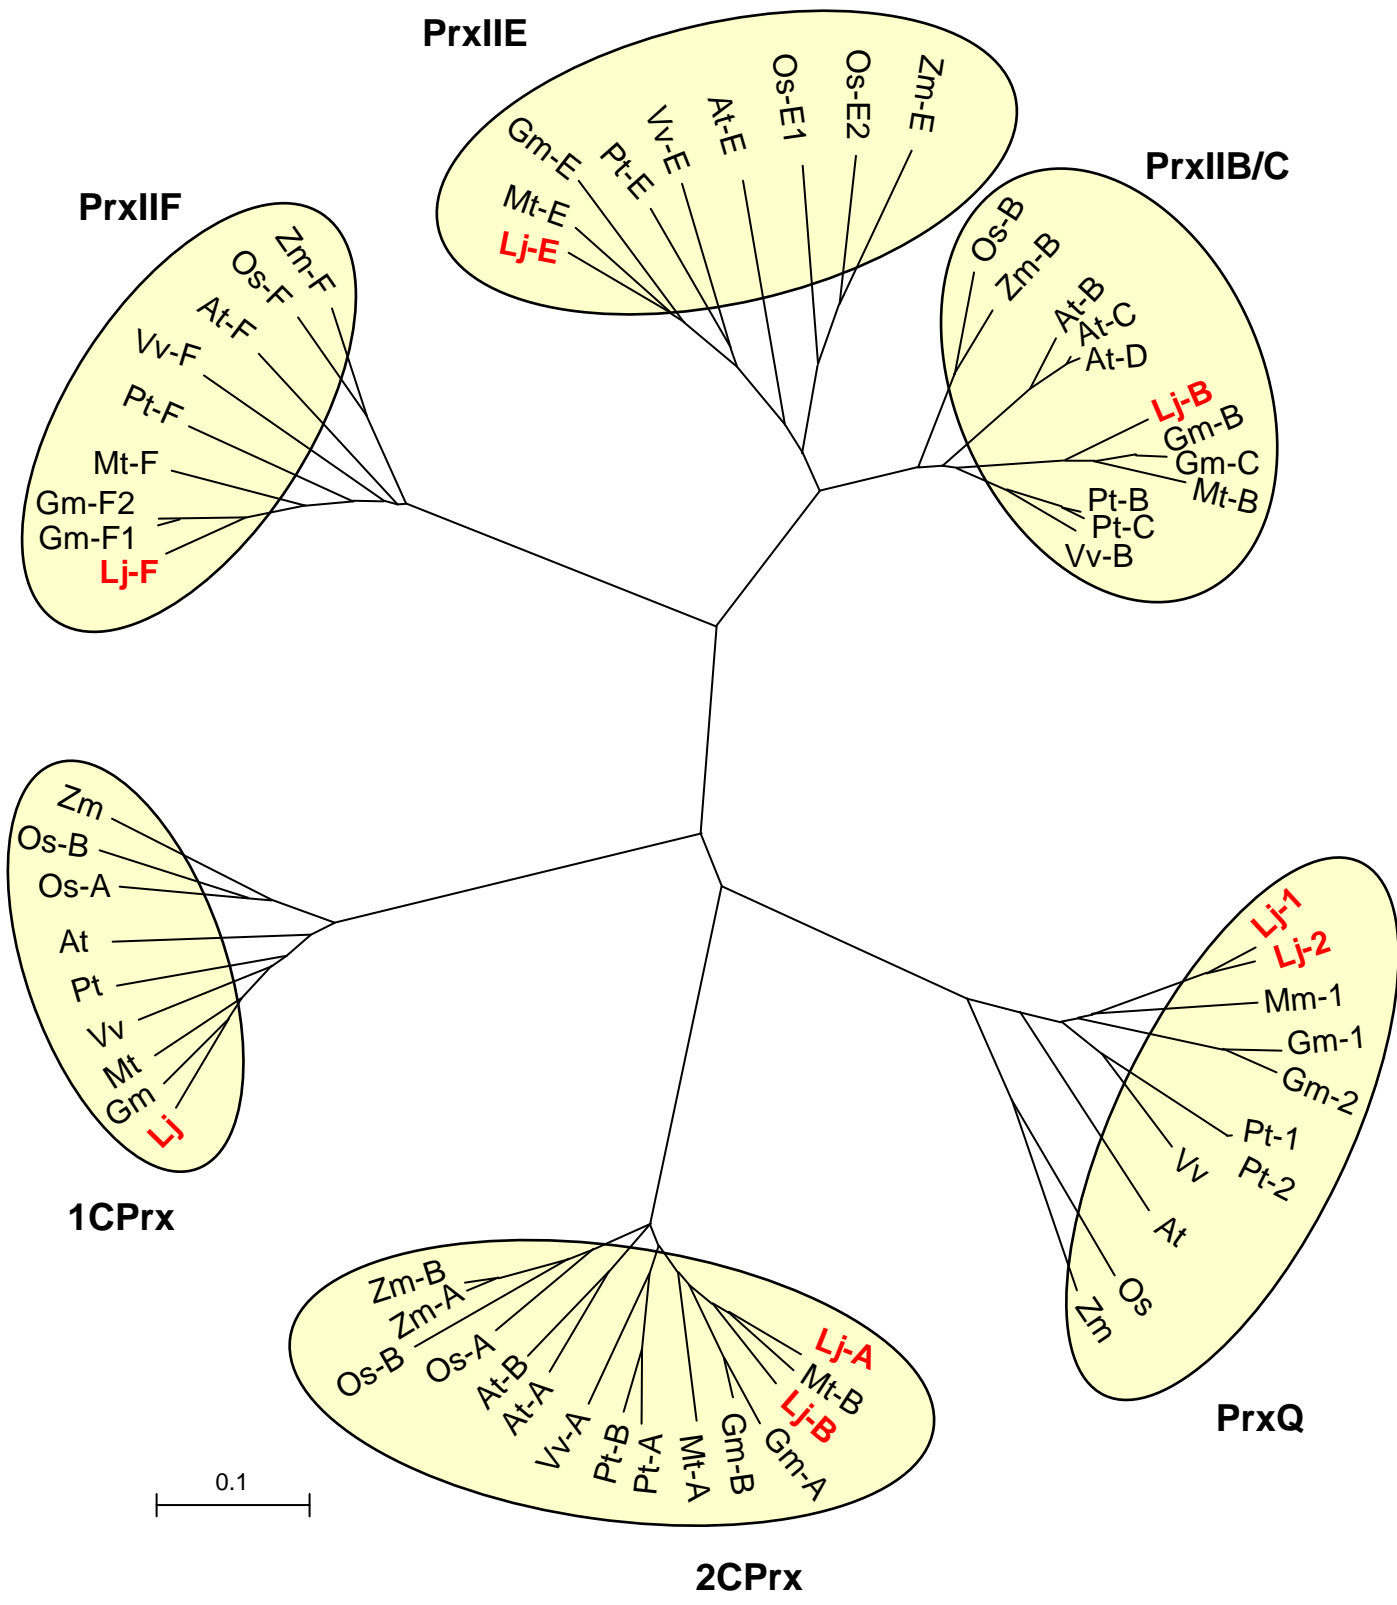

Supplement: supp_pp.111.177196_67-PP-Fig_S1_ok.pdf [file supp_pp.111.177196_67-PP-Fig_S1_ok.pdf]

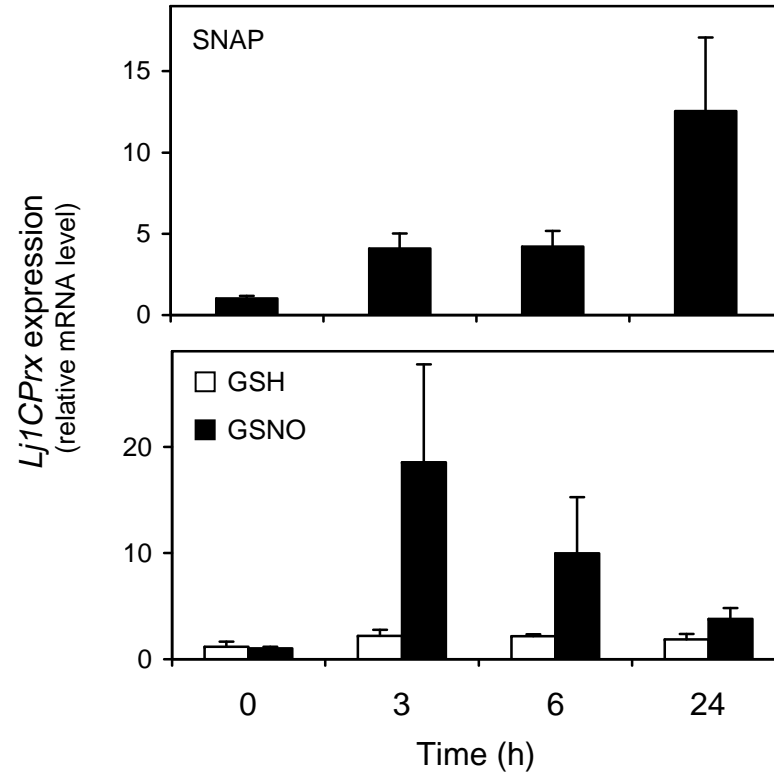

Supplement: supp_pp.111.177196_67-PP-Fig_S2_ok.pdf [file supp_pp.111.177196_67-PP-Fig_S2_ok.pdf]

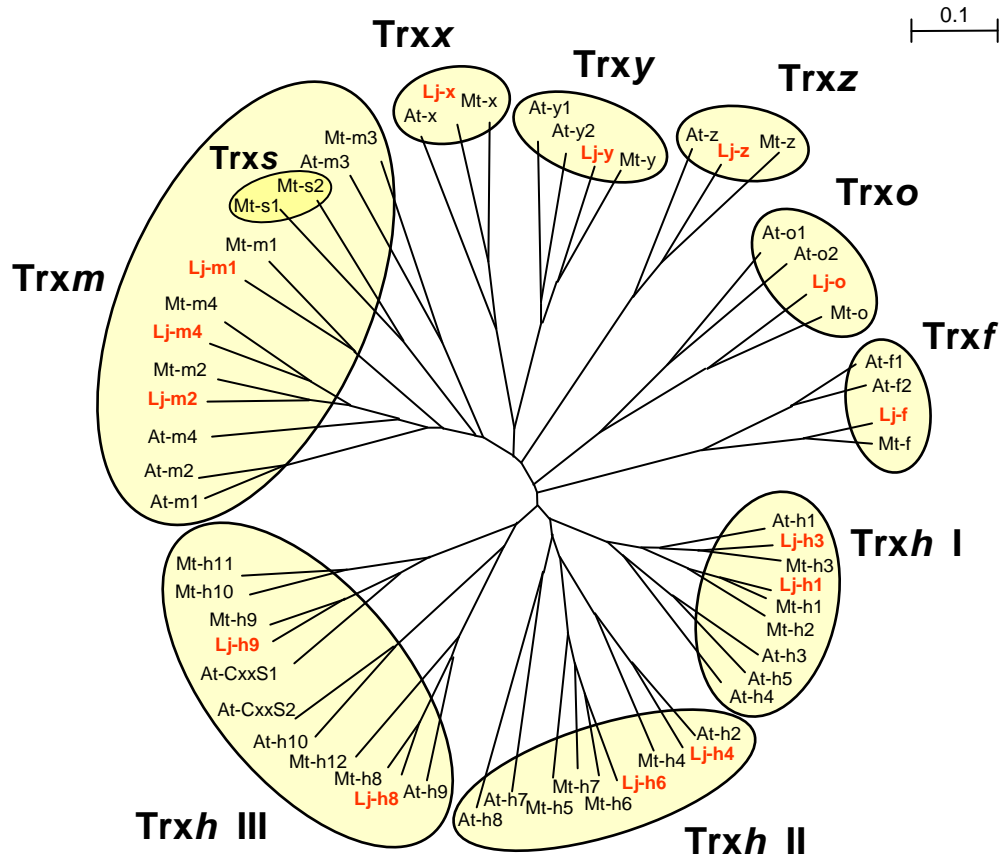

Supplement: supp_pp.111.177196_67-PP-Fig_S4_ok.pdf [file supp_pp.111.177196_67-PP-Fig_S4_ok.pdf]

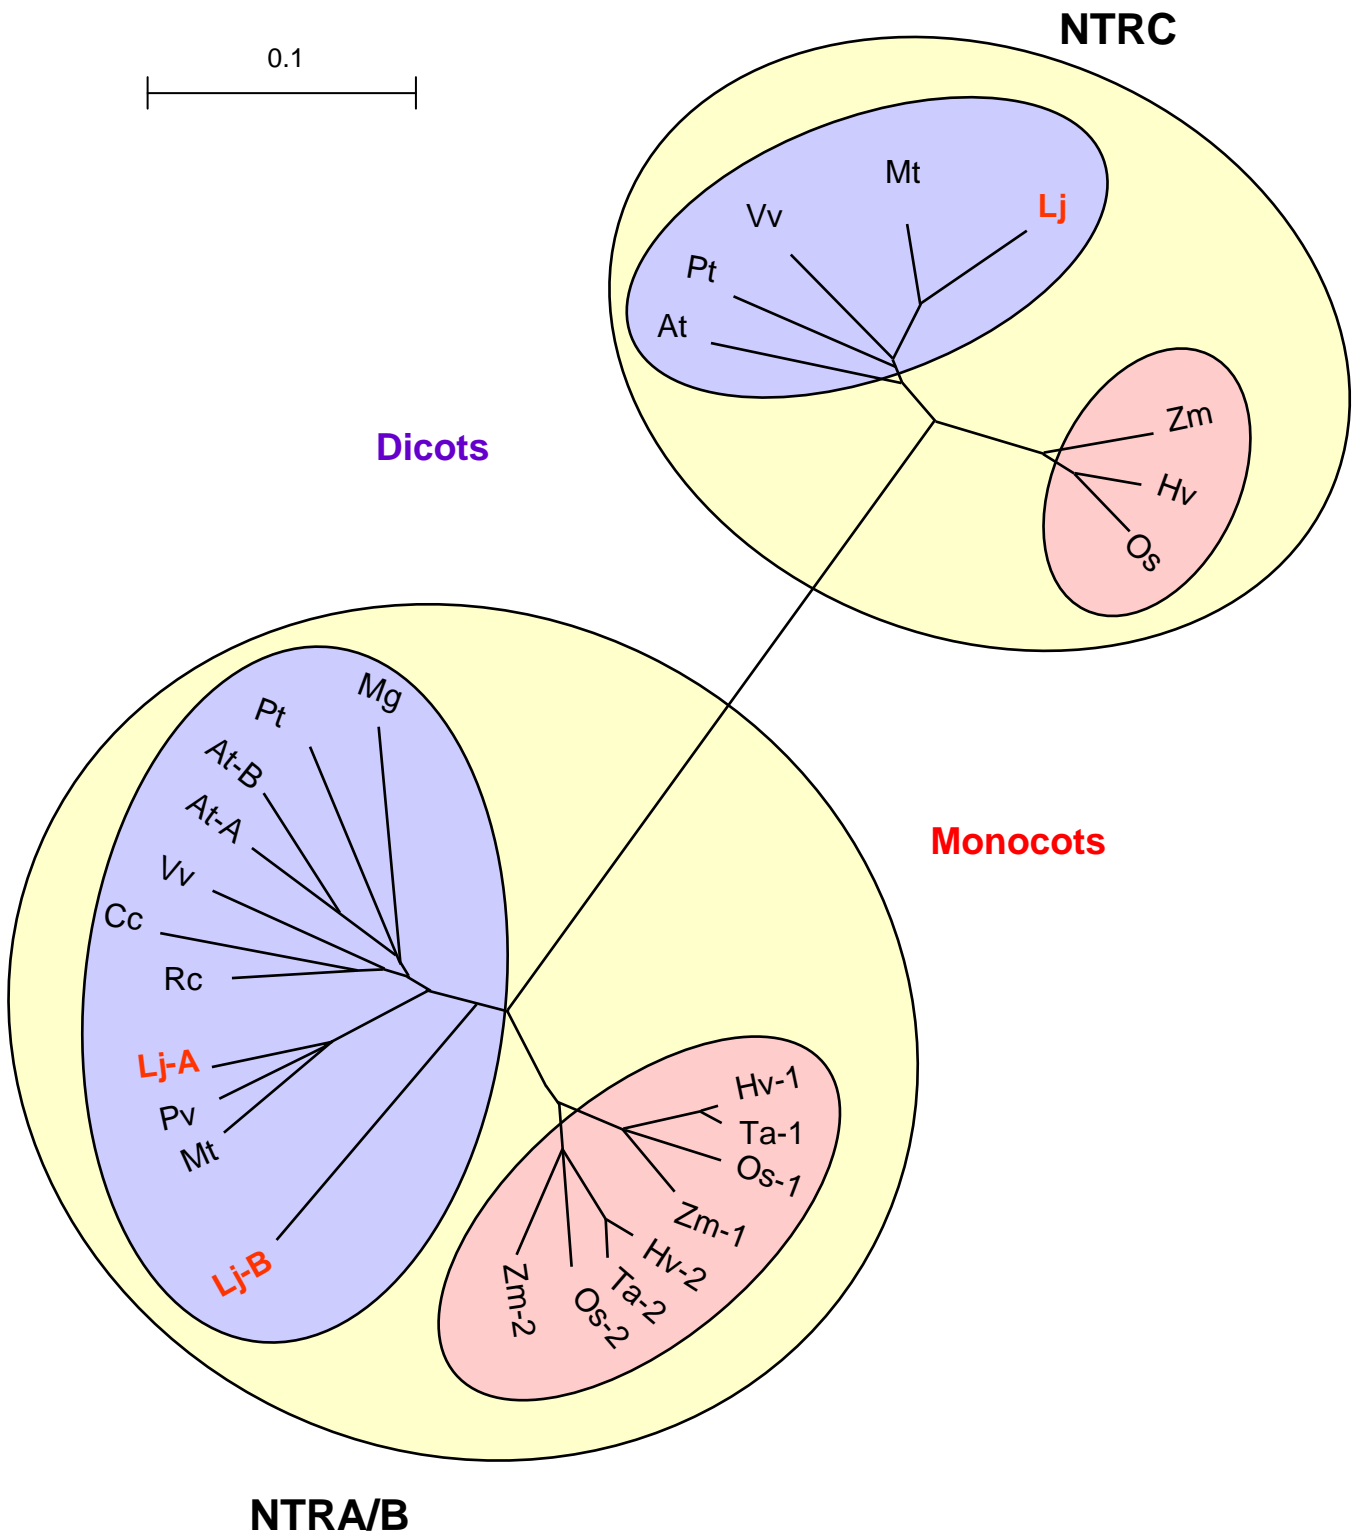

Supplement: supp_pp.111.177196_67-PP-Fig_S5_ok.pdf [file supp_pp.111.177196_67-PP-Fig_S5_ok.pdf]

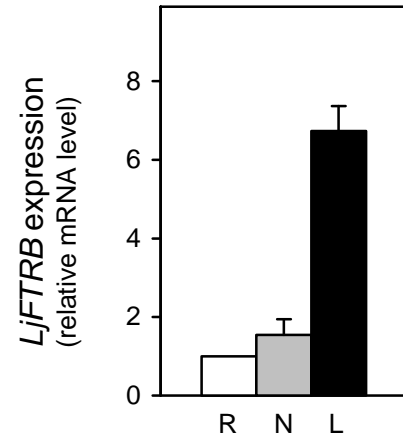

Supplement: supp_pp.111.177196_67-PP-Fig_S7_ok.pdf [file supp_pp.111.177196_67-PP-Fig_S7_ok.pdf]
